# Supplementary material
Source: Springer Nature journal article supplement (https://publikationen.ub.uni-frankfurt.de/files/1518/12896_2006_189_MOESM7_ESM.pdf)

**A**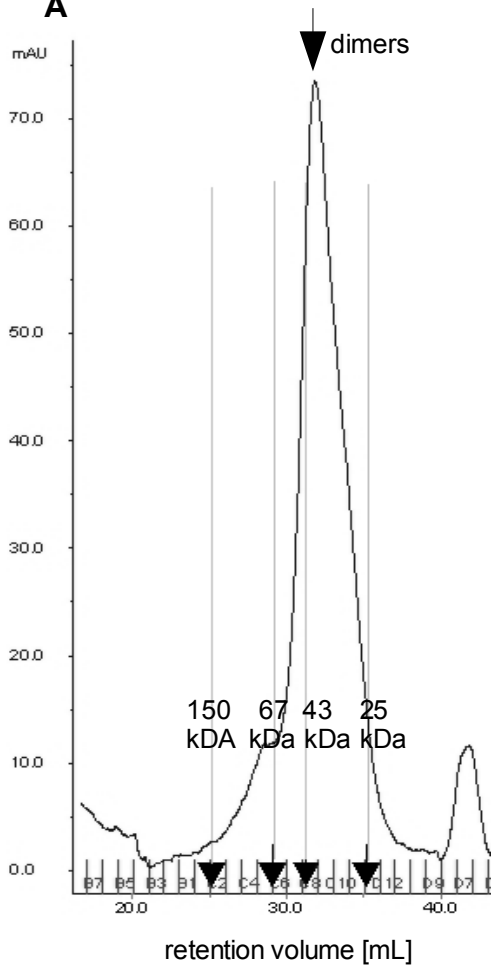**B**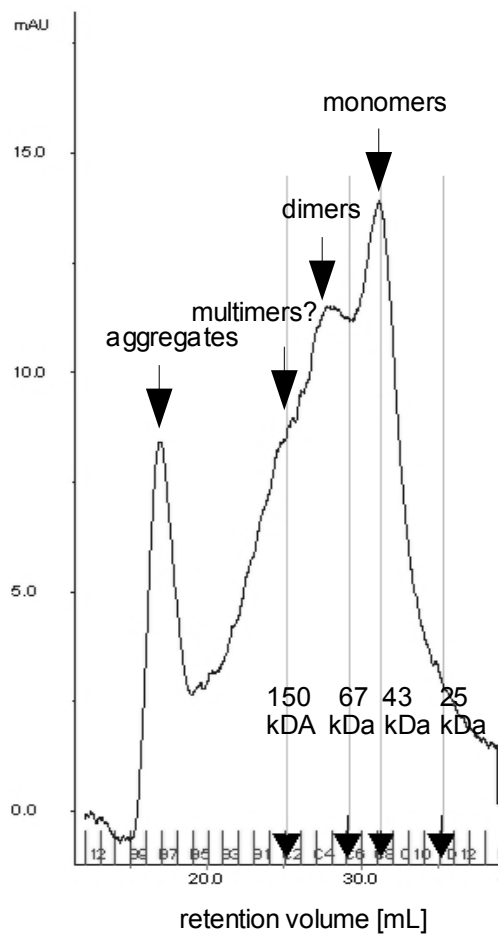

Supplement: MOESM7 [file 12896_2006_189_MOESM7_ESM.pdf]
